# Supplementary material for: Glyphosate-Eating Fungi: Study on Fungal Saprotrophic Strains’ Ability to Tolerate and Utilise Glyphosate as a Nutritional Source and on the Ability of Purpureocillium lilacinum to Degrade It
Source: MDPI journal article supplement (doi:10.3390/microorganisms9112179), 2021-10-20
Supplement: s1 [file s1]

## Supplementary Material S1

**Table S1.1.** In the table are reported the performed tests on each screenings' data.

| Screening                                                                                                                               | Outcome variable       | Performed tests                                                              |
|-----------------------------------------------------------------------------------------------------------------------------------------|------------------------|------------------------------------------------------------------------------|
| Screening of fungal strains for glyphosate commercial formulation tolerance                                                             | Diameter (mm)          | Friedman test followed by post-hoc Conover's test                            |
| Screening of fungal Strains for their ability to utilise glyphosate as nutritional source of C or P                                     | Diameter (mm)          | Friedman test followed by post-hoc Conover's test                            |
| Screening of <i>Purpureocillium lilacinum</i> for Glyphosate and Roundup breakdown and utilisation as P source in liquid culture medium | Dry weights (g)        | Welch test followed by post-hoc Dunnet's T3 test                             |
|                                                                                                                                         | pH                     | Welch test followed by post-hoc Dunnet's T3 test                             |
|                                                                                                                                         | P concentration (mg/L) | Welch test followed by post-hoc Dunnet's T3 test                             |
| Screening of pH medium influence on Glyphosate and Round Up breakdown by <i>Purpureocillium lilacinum</i>                               | Dry weights (g)        | One-way ANOVA followed by post-hoc Tukey honest significant differences test |
|                                                                                                                                         |                        | Two-way ANOVA followed by Simple main effect and Simple pairwise comparisons |
|                                                                                                                                         | pH                     | Friedman test followed by post-hoc Conover's test                            |
|                                                                                                                                         | P concentration (mg/L) | Welch test followed by post-hoc Dunnet's T3 test                             |

**Two-way ANOVA was conducted to examine the Treatments and TRIS buffer addition effects on Biomass production (dry weights) in the Screening of pH medium influence on Glyphosate and Round Up breakdown by *Purpureocillium lilacinum***

The two-way ANOVA assumptions were verified through appropriate tests whose results were:

- Absence of extreme outliers;
- normally distributed residuals (Shapiro-Wilk's normality test  $p > 0.05$ ); Normality assumption was also confirmed for each cell of design ( $p > 0.05$ );
- homogeneity of variance ( $p > 0.05$ ).

A two-way ANOVA was conducted to examine the Treatments and TRIS buffer addition effects on Biomass production (dry weights). ANOVA showed a statistically significant interaction between the buffer addition and the treatment influencing dry weights,  $F(3, 17) = 12.52$ ,  $p = 0.00014$ ,  $\eta^2[g] = 0.69$ .

### ANOVA Table

|   | Effect           | DFn | DFd | F       | p        | p<.05 | ges   |
|---|------------------|-----|-----|---------|----------|-------|-------|
| 1 | Treatment        | 3   | 17  | 114.950 | 1.73e-11 | *     | 0.953 |
| 2 | Buffer           | 1   | 17  | 8.326   | 1.00e-02 | *     | 0.329 |
| 3 | Treatment:Buffer | 3   | 17  | 12.515  | 1.45e-04 | *     | 0.688 |

Consequently, an analysis of simple main effects has been performed with statistical significance adjusted with the Bonferroni method. Finally, a simple pairwise comparison analysis was performed. A statistically significant difference in dry weight means between TRIS presence and TRIS absence conditions was observed in all treatments with the exception of CDB P- 1mM RU ( $p > 0.05$ ).

Table of Simple pairwise comparison

A tibble: 4 x 10

|   | Treatment       | term   | .y.   | group1  | group2    | df    | statistic | p        | p.adj    | p.adj.signif |
|---|-----------------|--------|-------|---------|-----------|-------|-----------|----------|----------|--------------|
| * | <chr>           | <chr>  | <chr> | <chr>   | <chr>     | <dbl> | <dbl>     | <dbl>    | <dbl>    | <chr>        |
| 1 | CDB             | Buffer | dw    | no TRIS | with TRIS | 17    | -4.42     | 0.000371 | 0.000371 | ***          |
| 2 | CDB P-          | Buffer | dw    | no TRIS | with TRIS | 17    | 3.36      | 0.00376  | 0.00376  | **           |
| 3 | CDB P-+1 mM GLY | Buffer | dw    | no TRIS | with TRIS | 17    | -3.82     | 0.00138  | 0.00138  | **           |
| 4 | CDB P-+1 mM RU  | Buffer | dw    | no TRIS | with TRIS | 17    | -0.681    | 0.505    | 0.505    | ns           |

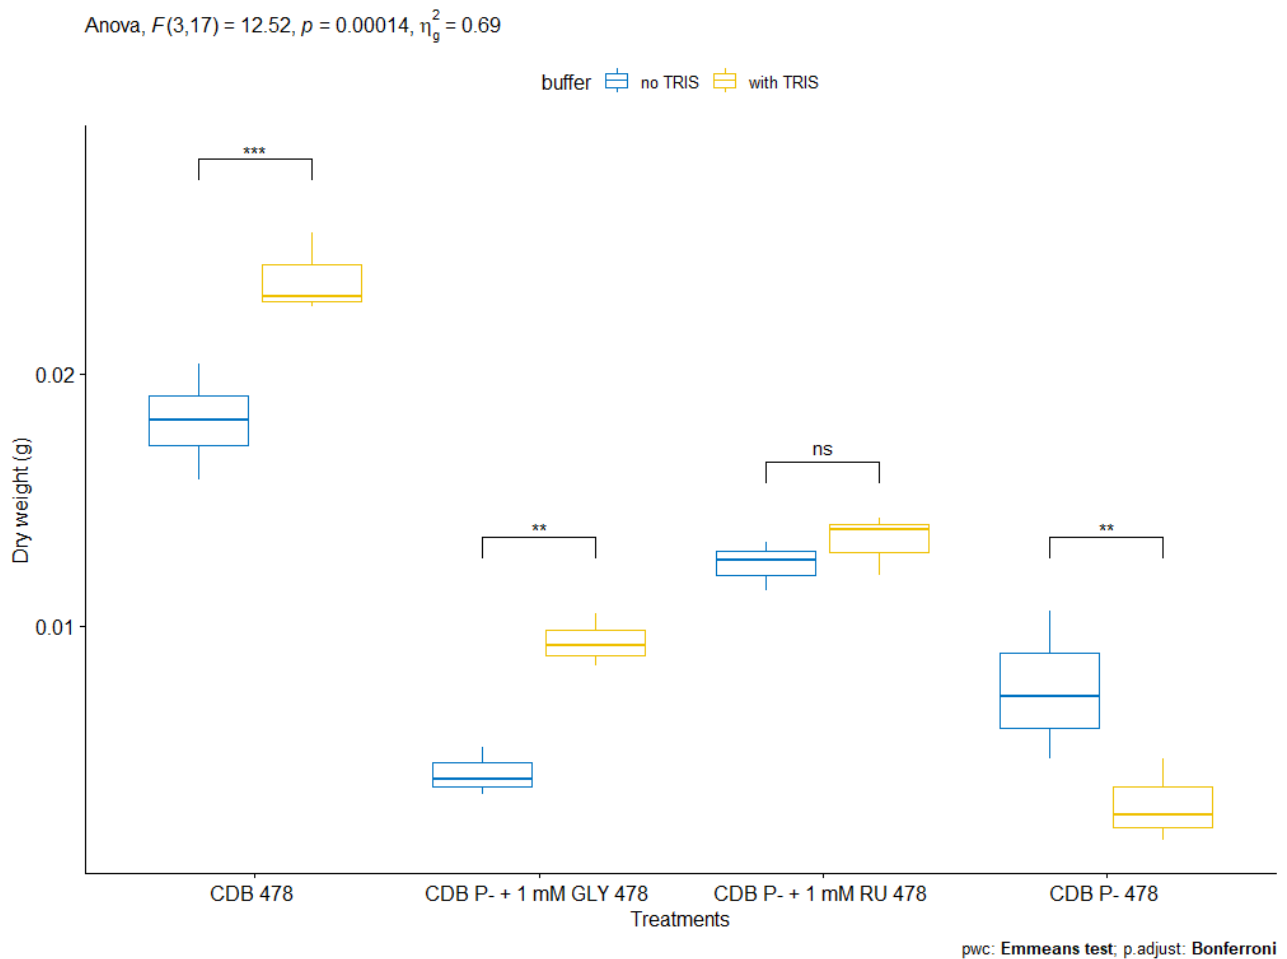

Figure S1.1: Boxplot of the Simple pairwise comparison output.
